# Supplementary material for: Influence of Parturition on Rumen Bacteria and SCFAs in Holstein Cows Based on 16S rRNA Sequencing and Targeted Metabolomics
Source: MDPI journal article supplement (doi:10.3390/ani13050782), 2023-02-21
Supplement: s1 [file s1]

**Supplemental Table S1.** The TMR diet formula of dairy cows before parturition

| Composition          | Content (%) | Item          | Unit (%) |
|----------------------|-------------|---------------|----------|
| Whole corn silage    | 32.01       | Crude Protein | 14.51    |
| Soybean hulls        | 12.46       | Starch        | 17.96    |
| Alfalfa hay          | 5.88        | NDF           | 39.01    |
| Rice straw           | 8.51        | Fat           | 3.81     |
| Soybean meal-protein | 9.02        | NEL (MJ/kg)   | 5.78     |
| Oat grass hay        | 12.54       |               |          |
| Premix <sup>1</sup>  | 4.25        |               |          |
| Cottonseed-whole     | 6.95        |               |          |
| Corn-fine            | 1.80        |               |          |
| Calcium carbonate    | 0.23        |               |          |
| Magnesium sulfate    | 0.35        |               |          |
| Sugar cane           | 1.97        |               |          |
| Methionine           | 0.19        |               |          |
| Puffed soy flour     | 2.86        |               |          |
| Yeast polysaccharide | 0.98        |               |          |

<sup>1</sup>Per kilogram of premix contains the following: VA 325 KIU, VE 2000 mg, VD 95 KIU, Co 18 mg, Se 10 mg, I 30 mg, Mn 1600 mg, Zn 800 mg, Cu 300 mg, Fe 400 mg, Ca 18.0%, P 6.8%.
