# Supplementary material for: Influence of Parturition on Rumen Bacteria and SCFAs in Holstein Cows Based on 16S rRNA Sequencing and Targeted Metabolomics
Source: MDPI journal article supplement (doi:10.3390/ani13050782), 2023-02-21
Supplement: s1 [file s1]

**Supplemental Table S3.** Precision and recovery rate of QC (quality control) samples

| Component             | Intra-day precision |      | Inter-day precision |      | Recovery |        |        |
|-----------------------|---------------------|------|---------------------|------|----------|--------|--------|
|                       | RSD%                |      | RSD%                |      | %        |        |        |
|                       | LQC                 | HQC  | LQC                 | HQC  | LQC      | MQC    | HQC    |
| Acetic acid (AA)      | 2.29                | 2.1  | 3.4                 | 1.58 | 104.63   | 93.58  | 92.23  |
| Propionic acid (PA)   | 0.55                | 1.82 | 1.57                | 1.45 | 105.09   | 102.3  | 102.66 |
| Isobutyric acid (IBA) | 1.28                | 1.34 | 1.26                | 3.07 | 99.98    | 87.42  | 109.3  |
| Butyric acid (BA)     | 1.37                | 1.25 | 1.86                | 2.99 | 93       | 101.49 | 109.72 |
| Isovaleric acid (IVA) | 0.42                | 1.94 | 1.75                | 3.25 | 94.4     | 109.28 | 108.36 |
| Valeric acid (VA)     | 1.33                | 3.64 | 1.2                 | 3.36 | 110.21   | 108.81 | 110.67 |
| Caproic acid (HA)     | 0.5                 | 2.29 | 1.12                | 2.49 | 99.51    | 106.6  | 109.99 |

**Note:** LQC, MQC and HQC respectively mean low, middle and high concentrations of QC samples.
