# Supplementary material for: Influence of Parturition on Rumen Bacteria and SCFAs in Holstein Cows Based on 16S rRNA Sequencing and Targeted Metabolomics
Source: MDPI journal article supplement (doi:10.3390/ani13050782), 2023-02-21
Supplement: s1 [file s1]

**Supplemental Table S3.** The concentrations of each SCFA in each rumen fluid sample  
( $\mu\text{g/mL}$ )

| Sample | AA   | BA   | CA   | IBA  | IVA  | PA   | VA   |
|--------|------|------|------|------|------|------|------|
| E1     | 1170 | 569  | 51   | 47.4 | 43.9 | 661  | 88.8 |
| E2     | 874  | 467  | 24.1 | 35.3 | 36   | 631  | 61.8 |
| E3     | 775  | 440  | 23.1 | 30.8 | 30.2 | 490  | 59.7 |
| E4     | 839  | 432  | 21.9 | 21.9 | 24.5 | 452  | 49.3 |
| E5     | 1000 | 482  | 37.5 | 38.4 | 32.7 | 671  | 73.4 |
| E6     | 1020 | 506  | 25.7 | 45.6 | 37.3 | 664  | 76.5 |
| E7     | 941  | 486  | 28.5 | 32.3 | 26.1 | 639  | 65.6 |
| E8     | 846  | 534  | 35.8 | 34.3 | 27.6 | 606  | 72.1 |
| E9     | 1080 | 648  | 35.5 | 19.1 | 41.3 | 633  | 81.3 |
| E10    | 1030 | 654  | 27.7 | 34.3 | 45.9 | 662  | 88.2 |
| A1     | 687  | 324  | 9.26 | 40.8 | 39.6 | 335  | 43.8 |
| A2     | 1080 | 478  | 12.4 | 82.9 | 77.9 | 571  | 68   |
| A3     | 561  | 271  | 12   | 29   | 25.5 | 265  | 31.4 |
| A4     | 958  | 464  | 21.6 | 56.1 | 47   | 481  | 64.1 |
| A5     | 674  | 366  | 13.5 | 32.6 | 30.9 | 344  | 40.4 |
| A6     | 248  | 133  | 4.77 | 11   | 12.2 | 108  | 12   |
| A7     | 149  | 81.7 | 2.57 | 7.39 | 8.7  | 70.8 | 10.1 |
| A8     | 950  | 597  | 35.5 | 64   | 59.8 | 558  | 79.1 |
| A9     | 373  | 258  | 16.4 | 16.2 | 22.4 | 186  | 33.5 |
| A10    | 660  | 309  | 13.7 | 26.4 | 25.6 | 318  | 34.4 |

**Note:** AA: acetic acid; PA: propionic acid; IBA: isobutyric acid; BA: butyric acid; IVA: isovaleric acid; VA: valeric acid; CA: caproic acid.
