# Supplementary material for: Influence of Parturition on Rumen Bacteria and SCFAs in Holstein Cows Based on 16S rRNA Sequencing and Targeted Metabolomics
Source: MDPI journal article supplement (doi:10.3390/ani13050782), 2023-02-21
Supplement: s1 [file s1]

**Supplemental Table S4.** Tags and average length of rumen bacteria communities

| Sample | Raw Tags | Clean Tags | Effective Tags | Avglen (nt) | Effective (%) |
|--------|----------|------------|----------------|-------------|---------------|
| E.1    | 72981    | 70250      | 45576          | 411         | 62.45         |
| E.2    | 99283    | 81838      | 60907          | 415         | 61.35         |
| E.3    | 78549    | 75283      | 44790          | 416         | 57.02         |
| E.4    | 71543    | 69008      | 43263          | 413         | 60.47         |
| E.5    | 73507    | 69998      | 43119          | 410         | 58.66         |
| E.6    | 67065    | 64420      | 39953          | 416         | 59.57         |
| E.7    | 78668    | 74043      | 48385          | 416         | 61.51         |
| E.8    | 61660    | 59166      | 34587          | 415         | 56.09         |
| E.9    | 66149    | 63872      | 42892          | 413         | 64.84         |
| E.10   | 70234    | 67902      | 42512          | 412         | 60.53         |
| A.1    | 61033    | 58173      | 36660          | 410         | 60.07         |
| A.2    | 63719    | 61306      | 38665          | 413         | 60.68         |
| A.3    | 60766    | 56768      | 35336          | 414         | 58.15         |
| A.4    | 74278    | 70419      | 42469          | 416         | 57.18         |
| A.5    | 62060    | 59725      | 39544          | 411         | 63.72         |
| A.6    | 72758    | 69166      | 41202          | 415         | 56.63         |
| A.7    | 70350    | 65965      | 42287          | 412         | 60.11         |
| A.8    | 58820    | 56637      | 34908          | 412         | 59.35         |
| A.9    | 56811    | 53679      | 35156          | 412         | 61.88         |
| A.10   | 79198    | 70832      | 45668          | 411         | 57.66         |
| Total  | 1399432  | 1318450    | 837879         | 413         | 59.90         |
