# Supplementary material for: Influence of Parturition on Rumen Bacteria and SCFAs in Holstein Cows Based on 16S rRNA Sequencing and Targeted Metabolomics
Source: MDPI journal article supplement (doi:10.3390/ani13050782), 2023-02-21
Supplement: s1 [file s1]

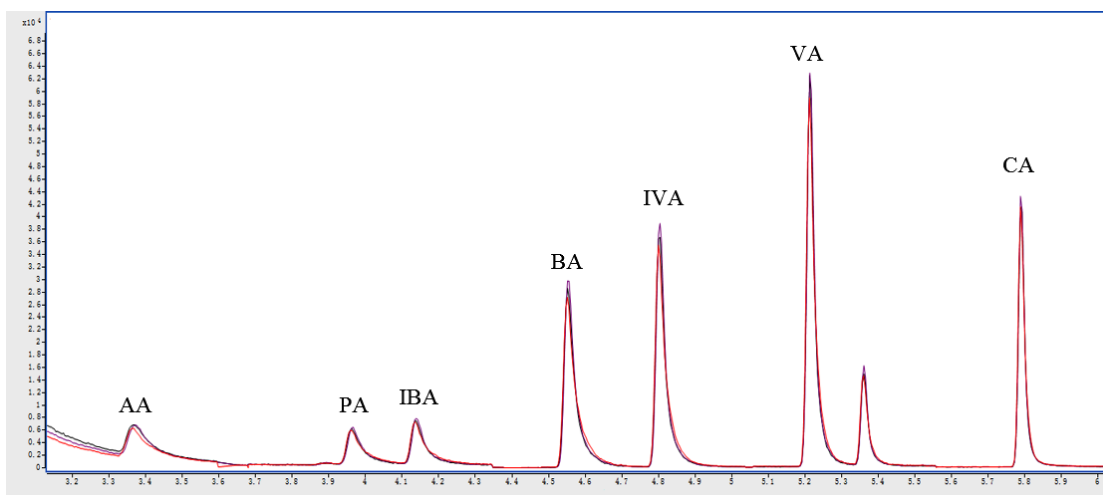

**Figure S1.** Total ion current (TIC) overlap of quality control sample (QC) mass spectrometry.

**Note:** The x-axis is the retention time of short-chain fatty acids (SCFAs), and the y-axis is the ion current intensity. The peak area of each chromatographic peak represents the relative content of the corresponding SCFA. AA: acetic acid; PA: propionic acid; IBA: isobutyric acid; BA: butyric acid; IVA: isovaleric acid; VA: valeric acid; Caproic acid (CA).
