# Supplementary material for: Influence of Parturition on Rumen Bacteria and SCFAs in Holstein Cows Based on 16S rRNA Sequencing and Targeted Metabolomics
Source: Animals (Basel). 2023 Feb 21;13(5):782. doi: 10.3390/ani13050782 (PMC10000066; doi:10.3390/ani13050782)
Supplement: Supplementary file 1 [file animals-13-00782-s001.zip]

Archive with 6 entries (6 files):
- Supplemental Figure S1.pdf
- Supplemental Table S1.pdf
- Supplemental Table S2.pdf
- Supplemental Table S3.pdf
- Supplemental table S4.pdf
- Supplemental Table S5.pdf
